# Supplementary material for: Platinum(II) Iodido Complexes of 7-Azaindoles with Significant Antiproliferative Effects: An Old Story Revisited with Unexpected Outcomes
Source: PLoS One. 2016 Dec 1;11(12):e0165062. doi: 10.1371/journal.pone.0165062 (PMC5131915; doi:10.1371/journal.pone.0165062)
Supplement: S1 Text — The complexes were dissolved in DMF-d7. (DOCX) [file pone.0165062.s002.docx]

**S1 Text. 1H–1H gs-COSY and 1H–13C gs-HMQC spectra of complexes 3, 7 and 8.** The complexes were dissolved in DMF-*d7*.

1H–1H gs-COSY spectrum of complex *cis*-[Pt(*3Br*aza)2I2] (**3**)





1H–13C gs-HMQC spectrum of complex *cis*-[Pt(*3Br*aza)2I2] (**3**)





1H–1H gs-COSY spectrum of complex *cis*-[Pt(*5Br*aza)2I2] (**7**)


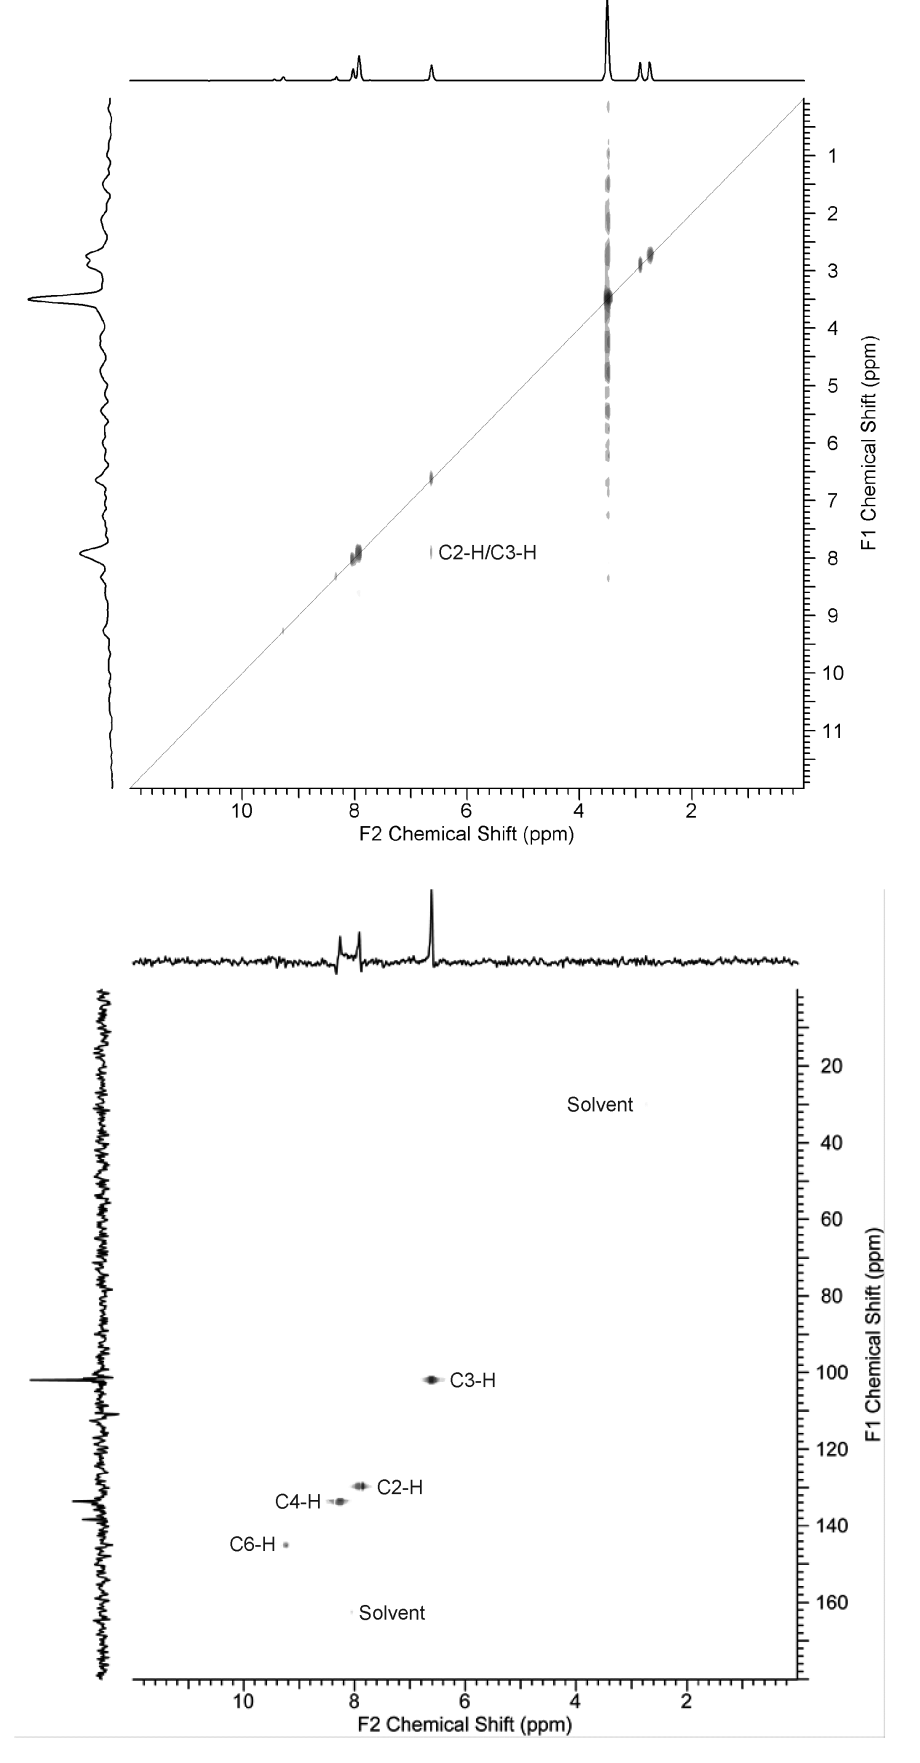


1H–13C gs-HMQC spectrum of complex *cis*-[Pt(*5Br*aza)2I2] (**7**)


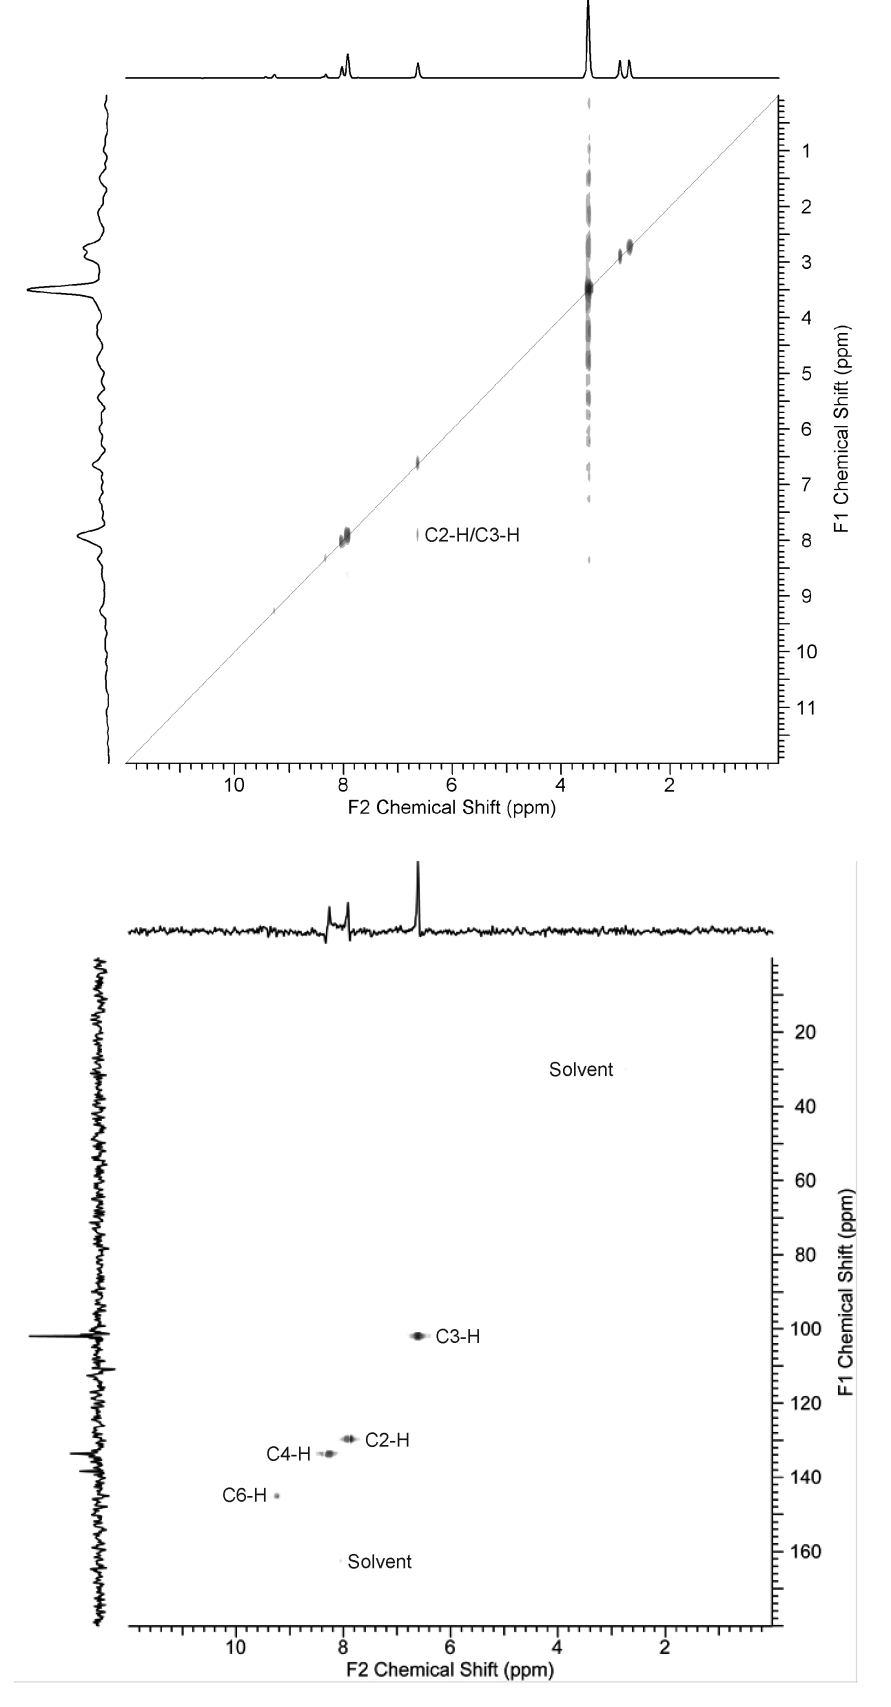


1H–1H gs-COSY spectrum of complex *cis*-[PtI2(*2Me4Cl*aza)2] (**8**)





1H–13C gs-HMQC spectrum of complex *cis*-[PtI2(*2Me4Cl*aza)2] (**8**)
